# Supplementary material for: Protocol for a scoping review of existing policies on the prevention and control of obesity across countries in Africa
Source: PubMed Central journal article supplement — BMJ Open. 2017 Feb 21;7(2):e013541. doi: 10.1136/bmjopen-2016-013541 (PMC5337729; doi:10.1136/bmjopen-2016-013541), 2017-02-21
Supplement: bmjopen-2016-013541supp_appendix.pdf [file bmjopen-2016-013541supp_appendix.pdf]

## Appendix: PubMed Search Strategy

| Search | Search terms                                                                                                                                                                                                                                                                                                                                                                                                                                                                                                                                                                                                                                               | Hits |
|--------|------------------------------------------------------------------------------------------------------------------------------------------------------------------------------------------------------------------------------------------------------------------------------------------------------------------------------------------------------------------------------------------------------------------------------------------------------------------------------------------------------------------------------------------------------------------------------------------------------------------------------------------------------------|------|
| 1      | Weight[tw] OR height[tw] OR BMI[tw] OR BMI z-scores[tw]<br>OR weight loss[tw] OR obesity [tw] OR non*communicable<br>disease* [tw] OR NCD* [tw] OR chronic disease*[tw]                                                                                                                                                                                                                                                                                                                                                                                                                                                                                    |      |
| 2      | Obesity, Overweight, Noncommunicable disease [MeSH Terms]                                                                                                                                                                                                                                                                                                                                                                                                                                                                                                                                                                                                  |      |
| 3      | Public polic*[tw] OR polic*[tw] OR government<br>regulation*[tw] OR regulatory [tw] OR guideline*[tw] OR<br>laws[tw] OR tax*[tw] OR subsid*[tw] OR strateg*[tw] OR<br>action plan*[tw] OR school program*[tw] OR school*<br>intervention[tw] school* study[tw]                                                                                                                                                                                                                                                                                                                                                                                             |      |
| 4      | Obesity prevention [tw] OR obesity treatment [tw] OR obesity<br>management[tw] OR health promot*[tw] OR health<br>education[tw] OR physical activit*[tw] OR physical<br>education[tw] OR exerci*[tw] OR fitness[tw] OR nutrition*<br>intervention[tw] OR diet* intervention[tw] OR nutrition polic*<br>OR [tw] school food polic*[tw]                                                                                                                                                                                                                                                                                                                      |      |
| 5      | # 1 OR # 2 OR # 3 OR # 4                                                                                                                                                                                                                                                                                                                                                                                                                                                                                                                                                                                                                                   |      |
| 6      | # 4 AND # 5                                                                                                                                                                                                                                                                                                                                                                                                                                                                                                                                                                                                                                                |      |
| 7      | (((((("Africa"[MeSH] OR Africa*[tw] OR Algeria[tw] OR<br>Angola[tw] OR Benin[tw] OR Botswana[tw] OR "Burkina<br>Faso"[tw] OR Burundi[tw] OR Cameroon[tw] OR "Canary<br>Islands"[tw] OR "Cape Verde"[tw] OR "Central African<br>Republic"[tw] OR Chad[tw] OR Comoros[tw] OR Congo[tw]<br>OR "Democratic Republic of Congo"[tw] OR Djibouti[tw] OR<br>Egypt[tw] OR "Equatorial Guinea"[tw] OR Eritrea[tw] OR<br>Ethiopia[tw] OR Gabon[tw] OR Gambia[tw] OR Ghana[tw] OR<br>Guinea[tw] OR "Guinea Bissau"[tw] OR "Ivory Coast"[tw] OR<br>"Cote d'Ivoire"[tw] OR Jamahiriya[tw] OR Jamahirya[tw] OR<br>Kenya[tw] OR Lesotho[tw] OR Liberia[tw] OR Libya[tw] OR |      |

|   |                                                                                                                                                                                                                                                                                                                                                                                                                                                                                                                                                                                                                                                                                                                                                                                                                                                                                                                                                                                                                                                                                                                                                                |  |
|---|----------------------------------------------------------------------------------------------------------------------------------------------------------------------------------------------------------------------------------------------------------------------------------------------------------------------------------------------------------------------------------------------------------------------------------------------------------------------------------------------------------------------------------------------------------------------------------------------------------------------------------------------------------------------------------------------------------------------------------------------------------------------------------------------------------------------------------------------------------------------------------------------------------------------------------------------------------------------------------------------------------------------------------------------------------------------------------------------------------------------------------------------------------------|--|
|   | <p>Libia[tw] OR Madagascar[tw] OR Malawi[tw] OR Mali[tw] OR Mauritania[tw] OR Mauritius[tw] OR Mayote[tw] OR Morocco[tw] OR Mozambique[tw] OR Mocambique[tw] OR Namibia[tw] OR Niger[tw] OR Nigeria[tw] OR Principe[tw] OR Reunion[tw] OR Rwanda[tw] OR "Sao Tome"[tw] OR Senegal[tw] OR Seychelles[tw] OR "Sierra Leone"[tw] OR Somalia[tw] OR "South Africa"[tw] OR "St Helena"[tw] OR Sudan[tw] OR Swaziland[tw] OR Tanzania[tw] OR Togo[tw] OR Tunisia[tw] OR Uganda[tw] OR "Western Sahara"[tw] OR Zaire[tw] OR Zambia[tw] OR Zimbabwe[tw] OR "Central Africa"[tw] OR "Central African"[tw] OR "West Africa"[tw] OR "West African"[tw] OR "Western Africa"[tw] OR "Western African"[tw] OR "East Africa"[tw] OR "East African"[tw] OR "Eastern Africa"[tw] OR "Eastern African"[tw] OR "North Africa"[tw] OR "North African"[tw] OR "Northern Africa"[tw] OR "Northern African"[tw] OR "South African"[tw] OR "Southern Africa"[tw] OR "Southern African"[tw] OR "sub Saharan Africa"[tw] OR "sub Saharan African"[tw] OR "subSaharan Africa"[tw] OR "subSaharan African"[tw]) NOT ("guinea pig"[tw] OR "guinea pigs"[tw] OR "aspergillus niger"[tw])</p> |  |
| 8 | <u># 6 AND # 7</u>                                                                                                                                                                                                                                                                                                                                                                                                                                                                                                                                                                                                                                                                                                                                                                                                                                                                                                                                                                                                                                                                                                                                             |  |
